# Supplementary material for: Autophagy is a gatekeeper of hepatic differentiation and carcinogenesis by controlling the degradation of Yap
Source: PubMed Central journal article supplement (PMC6251897; doi:10.1038/s41467-018-07338-z), 2018-11-23
Supplement: 41467_2018_7338_MOESM1_ESM.pdf [file 41467_2018_7338_MOESM1_ESM.pdf]

## **Supplementary Information**

### **Autophagy is a Gatekeeper of Hepatic Differentiation and Carcinogenesis by Controlling the Degradation of Yap**

**Lee et al.**

## Supplementary Figure 1

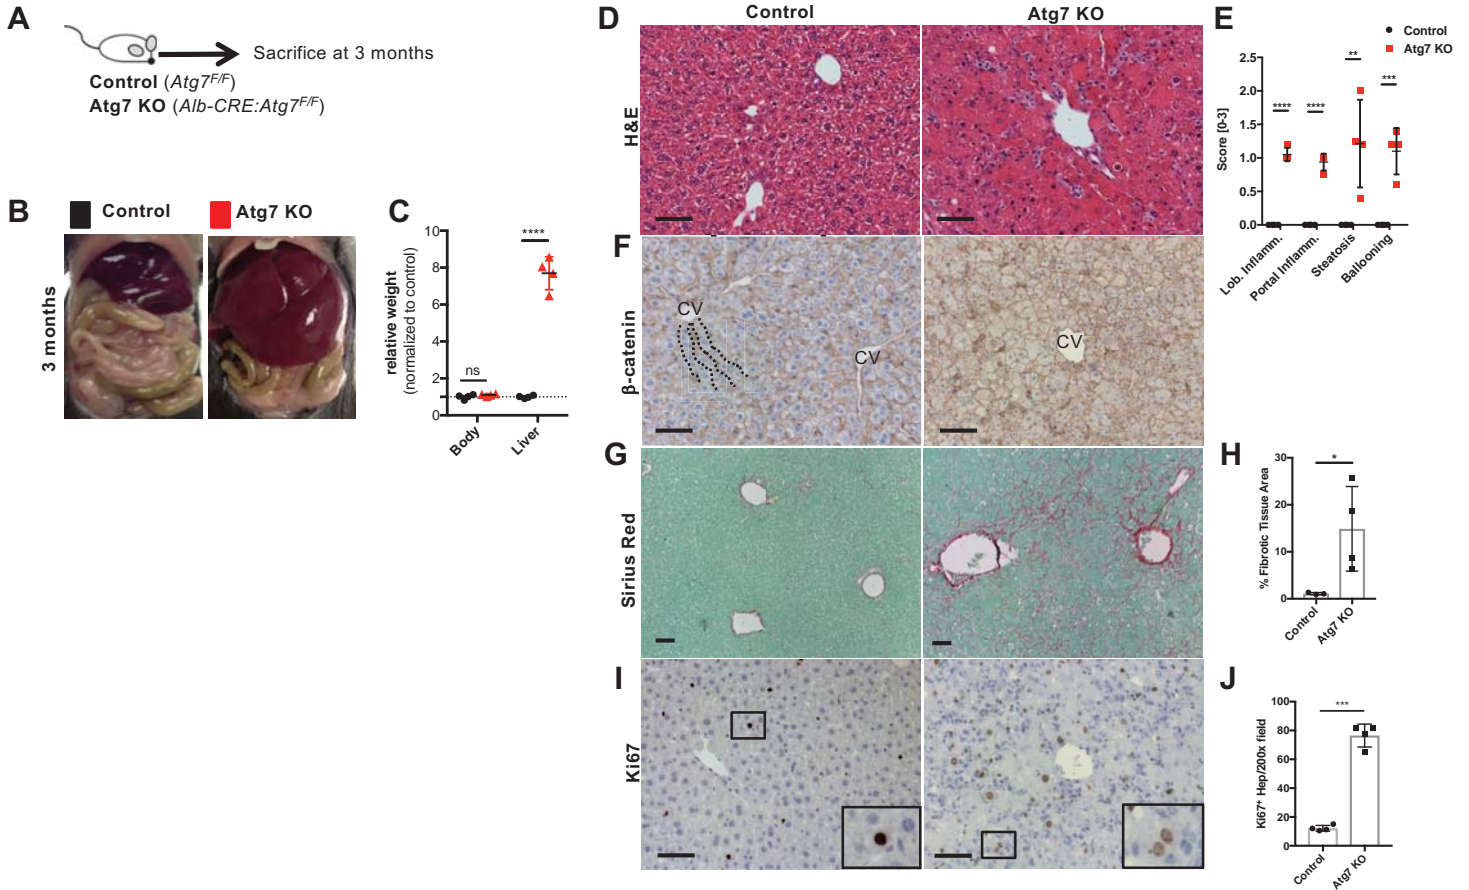

### Supplementary Figure 1 | Autophagy maintains organ size, cell size and number, differentiation in hepatocytes.

- Control (*Atg7<sup>F/F</sup>*) and Atg7 KO mice (*Alb-CRE:Atg7<sup>F/F</sup>*) were analyzed at 3 months of age, n=4 per group.
- Representative images of gross liver morphology of control and Atg7 KO mice
- Relative body and liver weights of control and Atg7 KO animals. ns, not significant.
- H&E staining of liver sections from control (*Atg7<sup>F/F</sup>*) and Atg7 KO (*Alb-CRE:Atg7<sup>F/F</sup>*) mice.
- Histological scoring for lobular inflammation, portal inflammation, steatosis and ballooning.
- Immunostaining for  $\beta$ -catenin in control and Atg7 KO mice. Dashed lines marks some hepatocyte trabeculae.
- Sirius red staining for fibrotic tissue in control and Atg7 KO mice.
- Quantification of fibrotic tissue area from sirius red/fast green staining (G) by Bioquant software of control and Atg7 KO liver sections. Evaluation of 25 100x fields per mouse. \*P=0.04
- Immunostaining for Ki67 in control and Atg7 KO mice. Large insert present magnification of small insets.
- Quantification of Ki67<sup>+</sup> nuclei per 200x field per mouse. Ten 200x fields per mouse were analyzed. \*\*\*P<0.0001

## Supplementary Figure 2

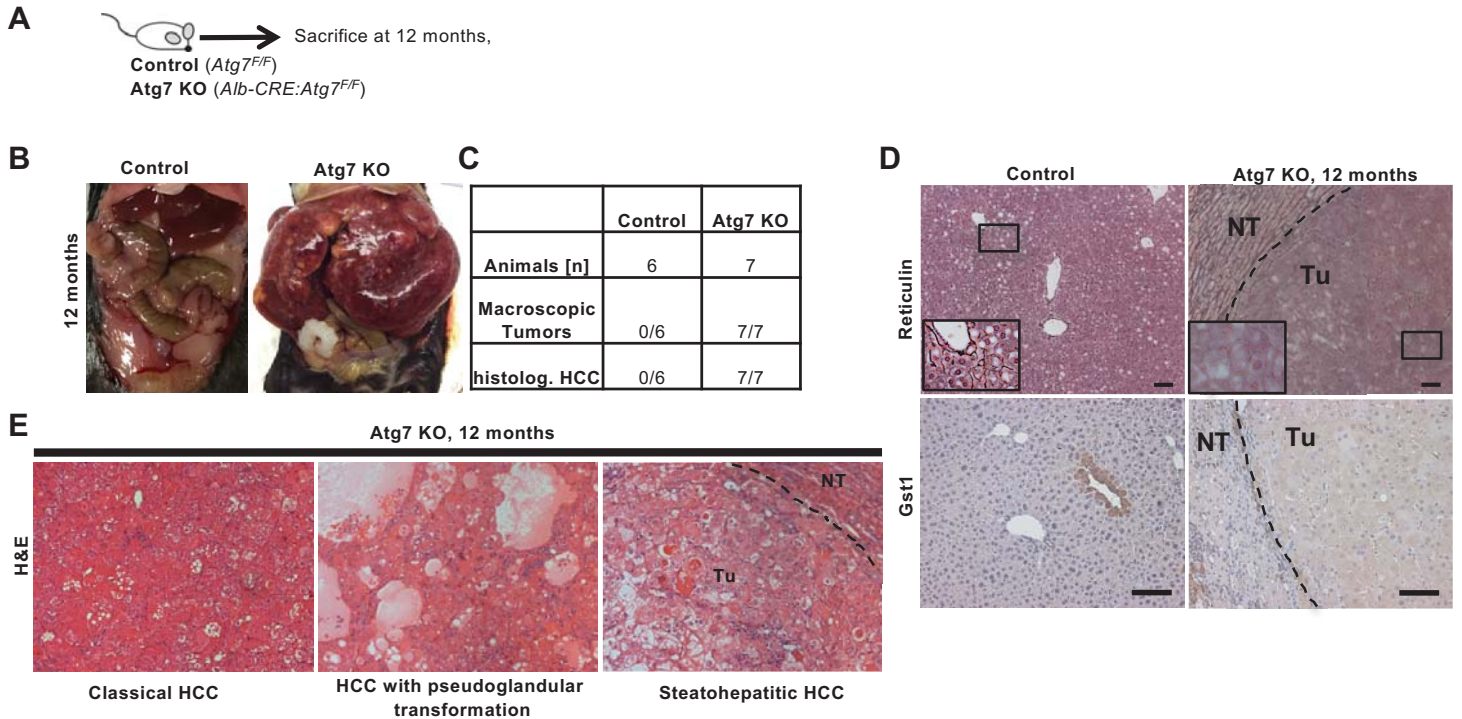

### Supplementary Figure 2 | Autophagy-defective murine livers develop hepatocellular carcinoma.

- A. Control (*Atg7<sup>F/F</sup>*) and Atg7 KO mice (*Alb-CRE:Atg7<sup>F/F</sup>*) were analyzed at 12 months of age, n=6 and 7 respectively.
- B. Representative images of gross liver morphology of control and Atg7 KO mice
- C. Distribution of control and Atg7 KO animals at 12 months with macroscopic presence or absence of tumors as well as histological HCC diagnosis. HCC, hepatocellular cancer.
- D. Reticulin and *Gst1* staining of liver sections from control and tumor sections.
- E. H&E staining of representative liver tumor sections from Atg7 KO mice.
- NT, non-tumorous tissue; Tu, Tumor. Large insert present magnification of small insets. Scale bar indicates 100  $\mu$ m.

### Supplementary Figure 3

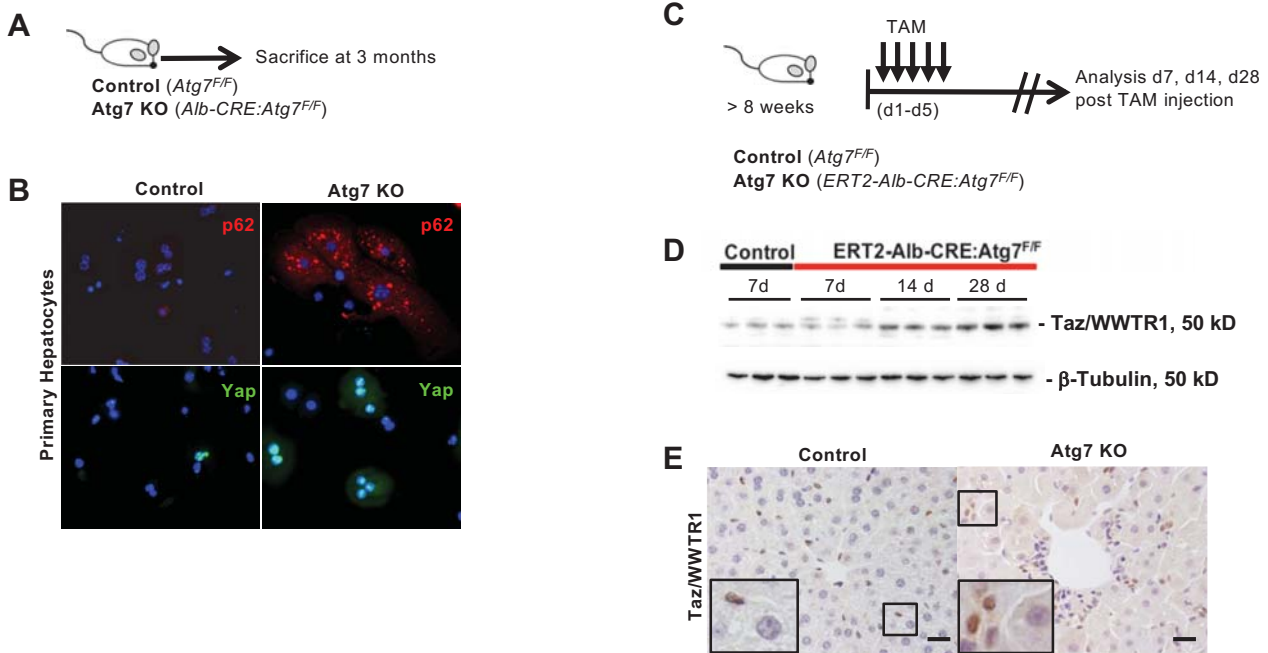

### Supplementary Figure 3 | Autophagy-defective murine livers display increased expression of Hippo tumor suppressor pathway effectors.

- Control (*Atg7<sup>F/F</sup>*) and Atg7 KO mice (*Alb-CRE:Atg7<sup>F/F</sup>*) were analyzed at 3 months of age.
- Immunofluorescence analysis for p62/Sqstm1 and Yap of primary hepatocytes from control and Atg7 KO mice.
- Tamoxifen (TAM)-inducible, hepatocyte-specific Atg7 KO (*ERT2-Alb-CRE:Atg7<sup>F/F</sup>*) and respective controls were analyzed 7 days, 14 days and 28 days after TAM injection. TAM, tamoxifen.
- Immunoblotting of whole liver lysates from controls and Atg7 KO mice for Taz/Wwtr1 and b-tubulin 7 days, 14 days and 28 days after TAM injection.
- Immunohistochemistry for Taz/Wwtr1 in Atg7 KO mice (*Alb-CRE/Atg7<sup>F/F</sup>*, 3 months of age). Large insets present magnification of small insets. Scale bar indicate 100  $\mu$ m.

## Supplementary Figure 4

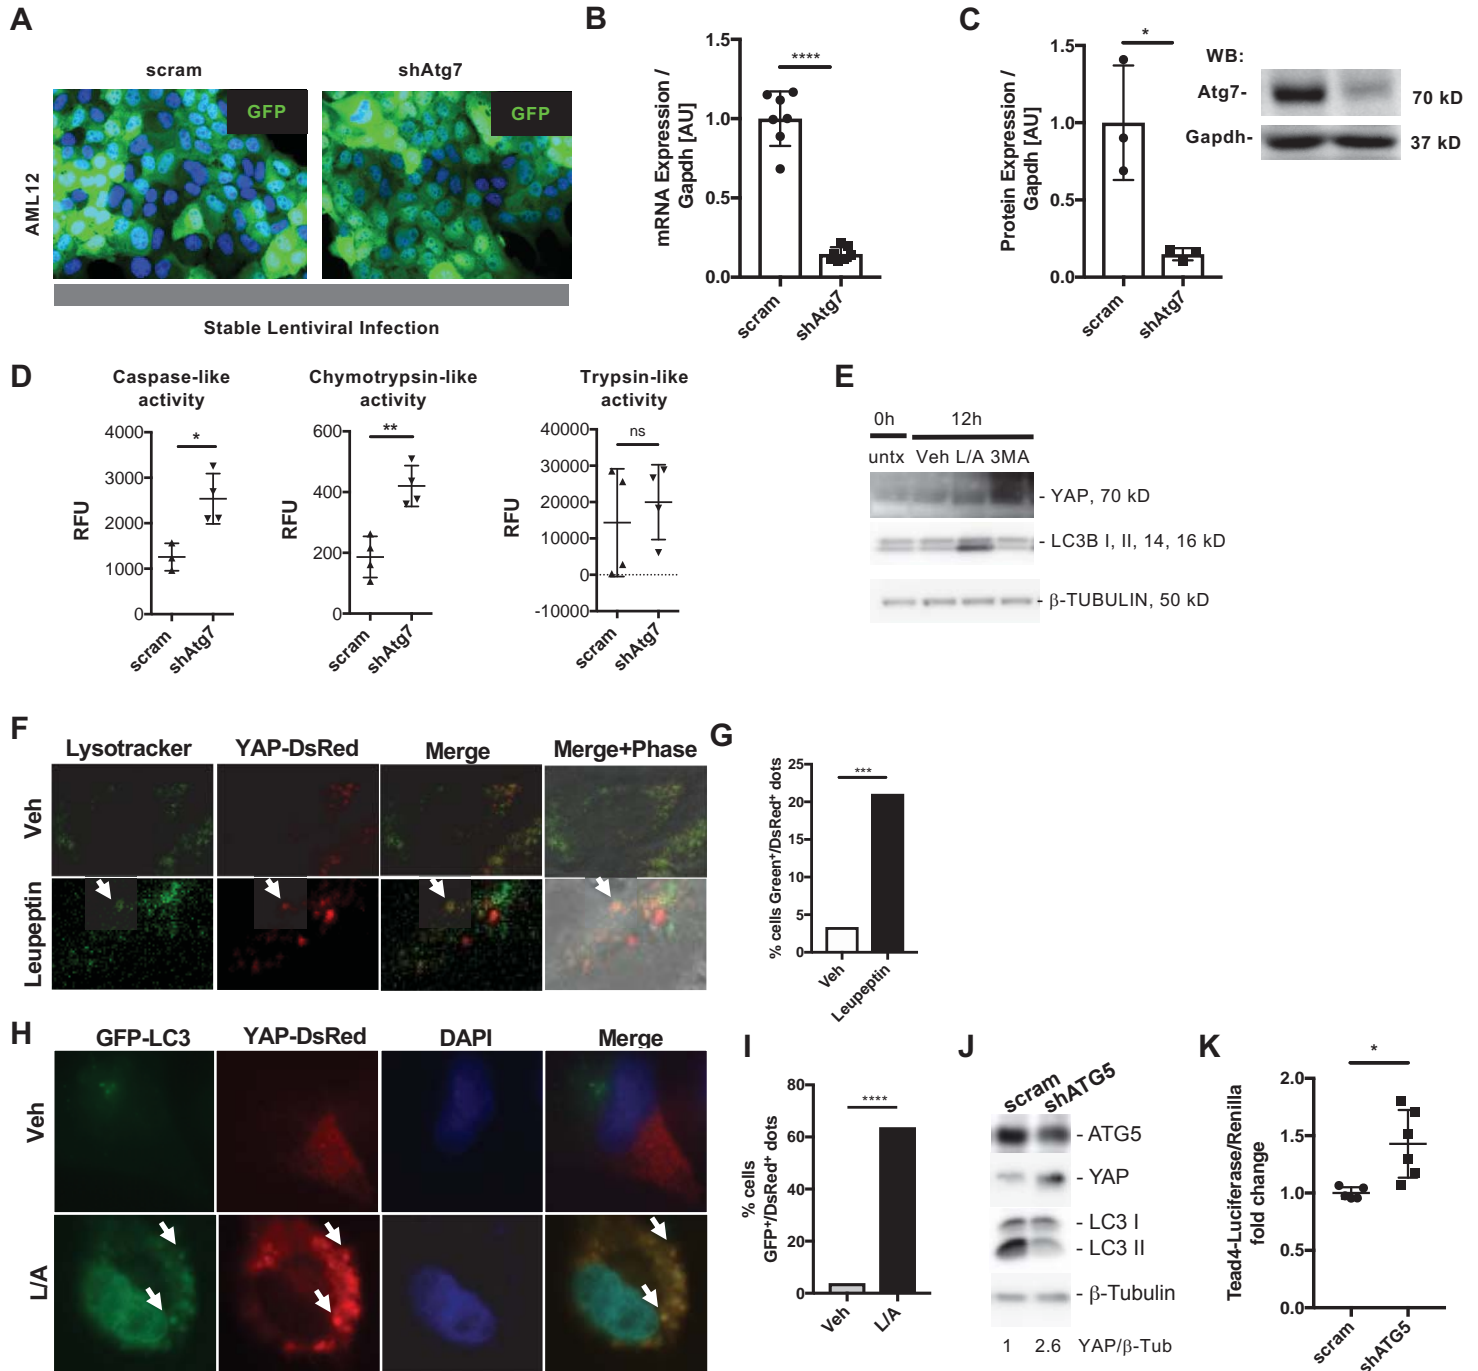

### Supplementary Figure 4 | Effective knock down of *Atg7* in shAtg7-AML12 cells and lysosomal degradation of Yap.

A. AML12 cells stably infected with scrambled (scram) or shAtg7 lentiviral vectors expressing GFP.

B. qRT-PCR analysis for *Atg7* mRNA in scram- and in shAtg7-infected AML12 cells. Data from 3 independent experiments, normalized to *Gapdh* expression, mean  $\pm$  SD. AU, arbitrary units. \*\*\*\* $P < 0.0001$  by two-tailed t-test.

C. Immunoblot analysis for Atg7 in scram and shAtg7-AML12. Quantification by densitometry by normalization to *Gapdh* expression. Data from 3 independent experiments, mean  $\pm$  SD. \*  $P = 0.0167$  by two-tailed t-test.

D. Proteasomal activity determination in scram- and shAtg7-AML12 cells. 4 biological replicates per group data representative of 2 independent experiments, mean  $\pm$  SD. \* $P < 0.05$ , \*\* $P < 0.005$  by two-tailed t-test. RFU, relative fluorescent units.

(Continued on next page)



**Supplementary Figure 4 | Effective knock down of *Atg7* in sh*Atg7*-AML12 cells and lysosomal degradation of Yap (*continued*)**

- E. Immunoblotting of whole cell lysates of THLE5B cells incubated with Leupeptin/ $\text{NH}_4\text{Cl}$  or vehicle. Untx, untreated; Veh, vehicle; L/A, Leupeptin/ $\text{NH}_4\text{Cl}$ ; 3MA, 3-Methyladenine; h, hours.
- F. Confocal live imaging analysis of THLE5B cells incubated with LysoTracker Green and transfected with YAP-DsRed. Treatment with Leupeptin or vehicle.
- G. Quantitative analysis of cells with LysoTracker Green<sup>+</sup> and DsRed<sup>+</sup> dots. (n= 89 and 57 cells, respectively). \*\*\*P=0.0005 by two tailed t-test.
- H. Immunofluorescence analysis of THLE5B cells transfected with GFP-LC3 and YAP-DsRed. Incubation with Leupeptin/ $\text{NH}_4\text{Cl}$  or vehicle. Veh, vehicle; L/A, Leupeptin/ $\text{NH}_4\text{Cl}$ .
- I. Quantitative analysis of cells with GFP<sup>+</sup>/DsRed<sup>+</sup> dots. (n= 51 and 69 cells, respectively). \*\*\*\*P<0.0001 by two tailed t-test.
- J. Immunoblot analysis of scram- and shATG5 infected THLE5B cell lysates for ATG5, YAP, LC3 and  $\beta$ -tubulin.
- K. Tead4-Luciferase analysis in scram- and shATG5 infected THLE5B cells. Data represent mean $\pm$ SD from 2 independent experiments. \*P=0.01 by two tailed t-test.

## Supplementary Figure 5

**A**

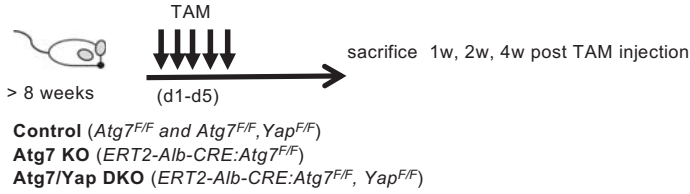

**B**

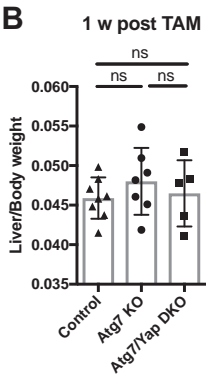

**C**

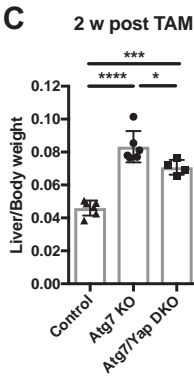

**D**

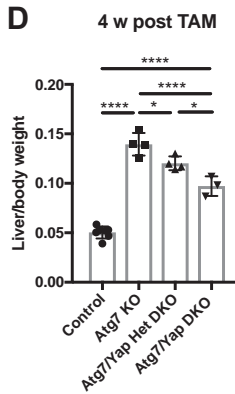

**E**

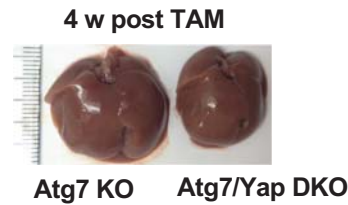

**F**

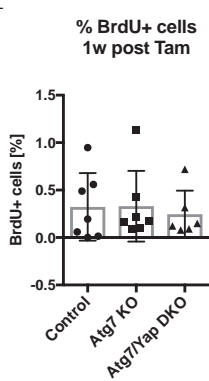

**G**

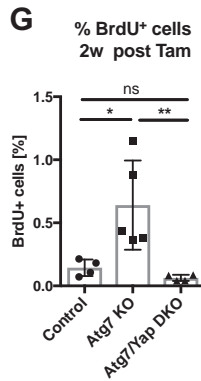

**H**

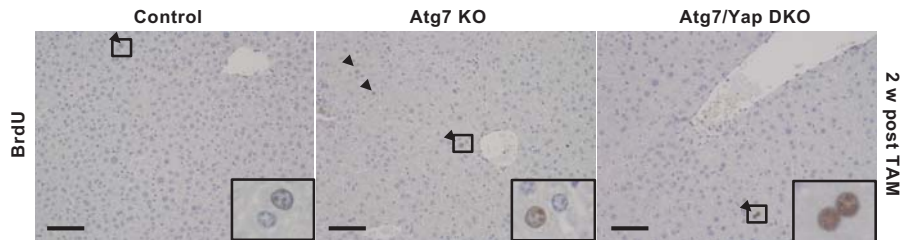

### Supplementary Figure 5 | Yap deletion in *Atg7* KO mice attenuates hepatomegaly and proliferative activity in *Atg7* KO mice.

- Control *Atg7<sup>F/F</sup>* and *Atg7<sup>F/F</sup>, Yap<sup>F/F</sup>*) and TAM-inducible, hepatocyte specific *Atg7* KO (*ERT2-Alb-CRE:Atg7<sup>F/F</sup>*) and *Atg7/Yap* DKO (*ERT2-Alb-CRE:Atg7<sup>F/F</sup>, Yap<sup>F/F</sup>*) were analyzed 1 week, 2 weeks, 4 weeks after TAM injection. TAM, tamoxifen.
- Liver/body weight ratio in control, *Atg7* KO and *Atg7/Yap* DKO mice 1 week after TAM injection. N=4 per group.
- Liver/body weight ratio in control, *Atg7* KO and *Atg7/Yap* DKO mice 2 weeks after TAM injection. N=4 per group.
- Liver/body weight ratio in control, *Atg7* KO and *Atg7/Yap* DKO mice 4 weeks after TAM injection. N= 4, 4, 3 animals per group.
- Representative image of gross liver morphology of *Atg7* KO and *Atg7/Yap* DKO 4 weeks post TAM injection.
- Quantification of % BrdU<sup>+</sup> nuclei per 100x field in liver sections from control, *Atg7* KO and *Atg7/Yap* DKO mice 1 weeks after TAM injection. Ten 100x fields per mouse were analyzed. n=4 per group.
- Quantification of % BrdU<sup>+</sup> nuclei per 100x field in liver sections from control, *Atg7* KO and *Atg7/Yap* DKO mice 2 weeks after TAM injection. Ten 100x fields per mouse were analyzed. n=4 per group.
- BrdU staining of control, *Atg7* KO and *Atg7/Yap* DKO liver sections. Scale bar 100 μm. Large insets present magnification of small insets.
- Data represent mean±SD. P-values analyzed by one-way ANOVA and Tukey's HSD. \*P<0.05, \*\*P<0.01, \*\*\*P<0.0005, \*\*\*\*P<0.0001 unless indicated otherwise. ns, not significant.

## Supplementary Figure 6

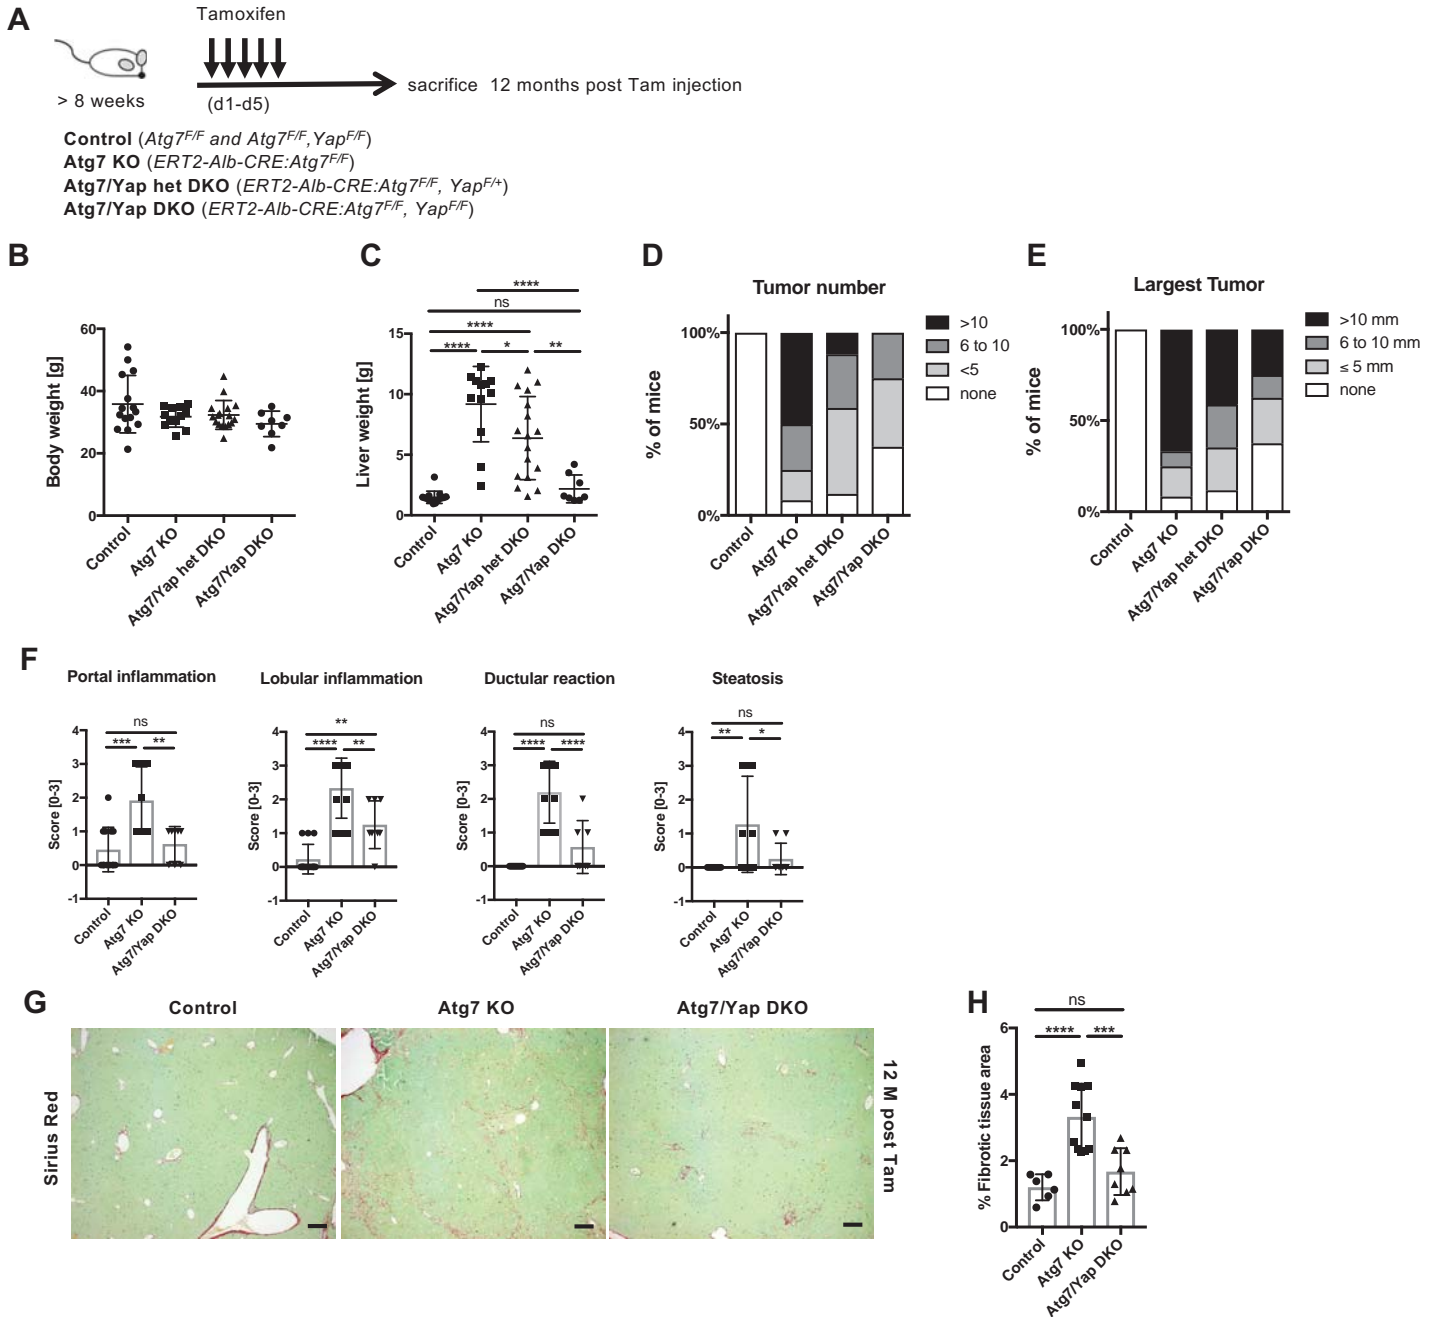

### Supplementary Figure 6 | Loss of Yap in *Atg7* KO mice leads to attenuation of liver injury, fibrosis and hepatocarcinogenesis.

- A. Control (*Atg7<sup>F/F</sup>* and *Atg7<sup>F/F</sup>, Yap<sup>F/F</sup>*) and TAM-inducible, hepatocyte specific *Atg7* KO (*ERT2-Alb-CRE:Atg7<sup>F/F</sup>*) and *Atg7/Yap* het DKO (*ERT2-Alb-CRE:Atg7<sup>F/F</sup>, Yap<sup>F/+</sup>*) and *Atg7/Yap* DKO (*ERT2-Alb-CRE:Atg7<sup>F/F</sup>, Yap<sup>F/F</sup>*) were analyzed 12 months after TAM injection. N=15, 12, 17 and 8 animals, respectively.
- B. Body weights of control, *Atg7* KO, *Atg7/Yap* het DKO and *Atg7/Yap* DKO 12 m post TAM. No significant differences between groups.
- C. Liver weights of control, *Atg7* KO, *Atg7/Yap* het DKO and *Atg7/Yap* DKO 12 m post TAM. \*\*P=0.0018
- D. Percentage of mice (control, *Atg7* KO, *Atg7/Yap* het DKO and *Atg7/Yap* DKO 12 m post TAM) with none, <5, 6-10 or >10 macroscopic tumors.
- E. Percentage of mice (control, *Atg7* KO, *Atg7/Yap* het DKO and *Atg7/Yap* DKO 12 m post TAM) with no tumor or largest tumor size < 5 mm, 6-10 mm or >10 mm.
- (Continued on next page)



**Supplementary Figure 6 | Loss of Yap in Atg7 KO mice leads to attenuation of liver injury, fibrosis and hepatocarcinogenesis (*continued*)**

F. Histological scoring of portal inflammation, lobular inflammation, ductular reaction, steatosis.

G. Sirius red staining of liver section of control, Atg7 KO and Atg7/Yap DKO.

H. Quantification of fibrotic tissue area in control, Atg7 KO and Atg7/Yap DKO. 25 100x pictures per animal were analyzed.

Data represent mean±SD. P-values analyzed by one-way ANOVA and Tukey's HSD. \* $p < 0.05$ , \*\* $p < 0.01$ , \*\*\* $p < 0.001$ , \*\*\*\* $p < 0.0001$  unless indicated otherwise. ns, not significant. Scale bar indicates 100  $\mu\text{m}$ .

Supplementary Information – uncropped Immunoblots

IB Figure 1J

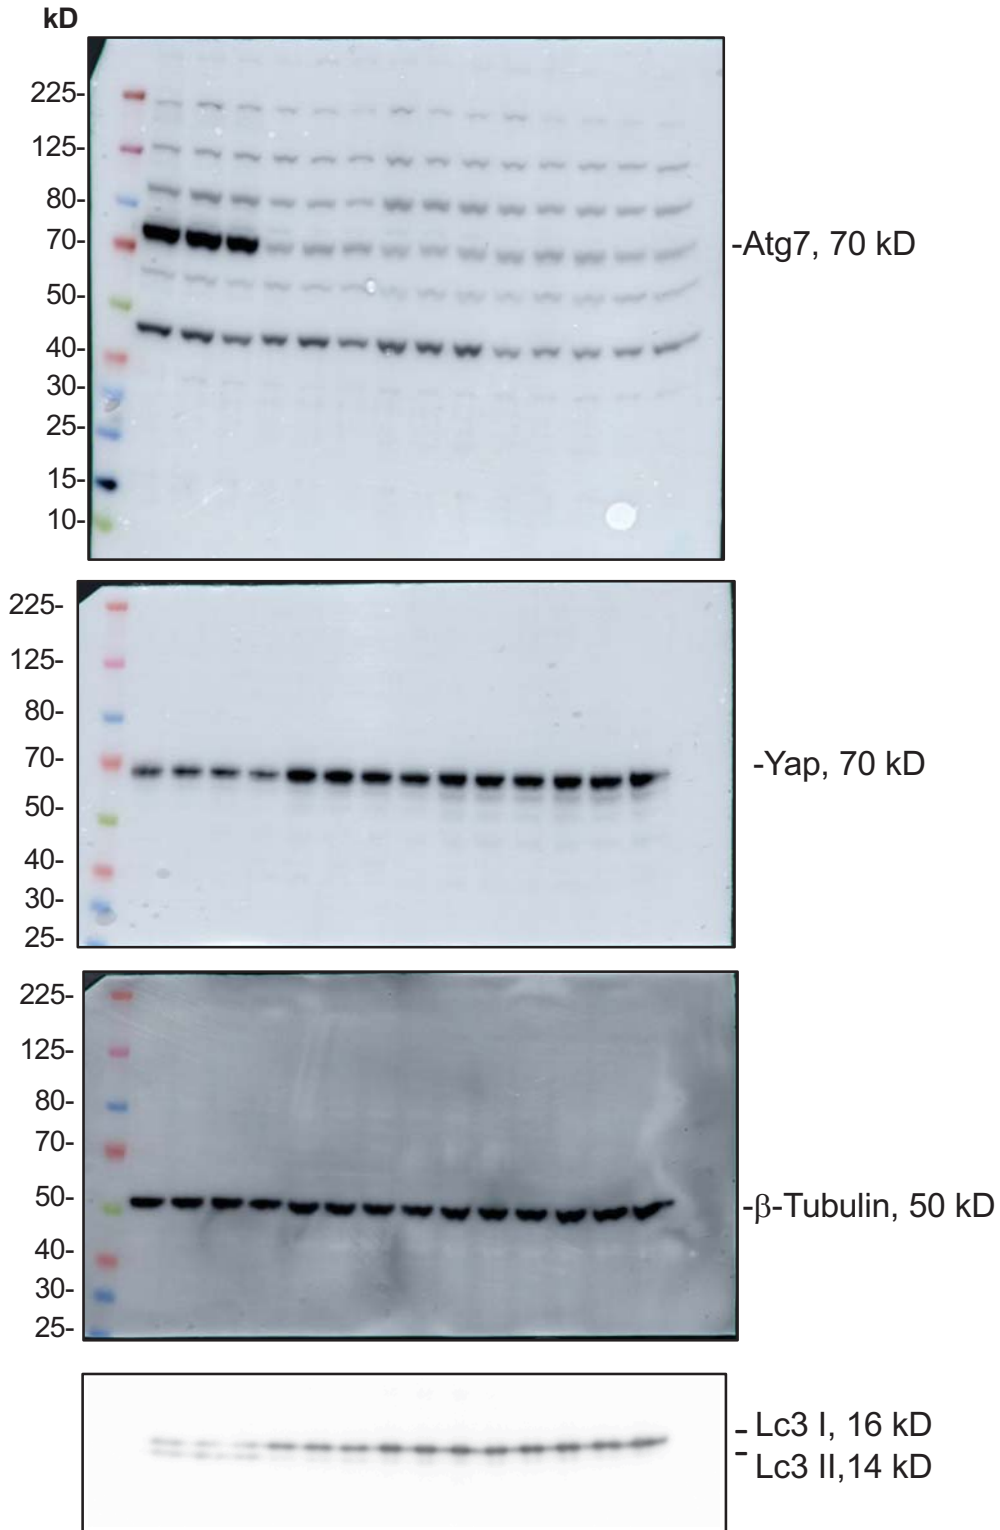

Supplementary Information – uncropped Immunoblots

IB Figure 1J continued

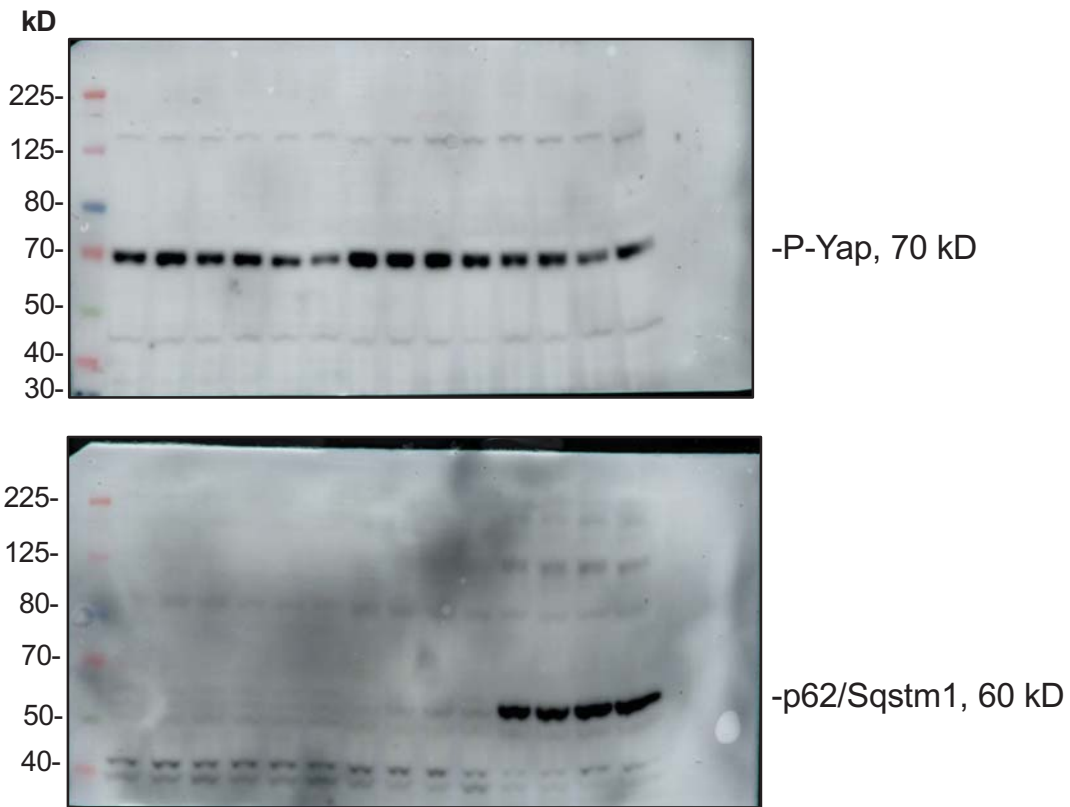

Supplementary Information – uncropped Immunoblots

IB Figure 2B

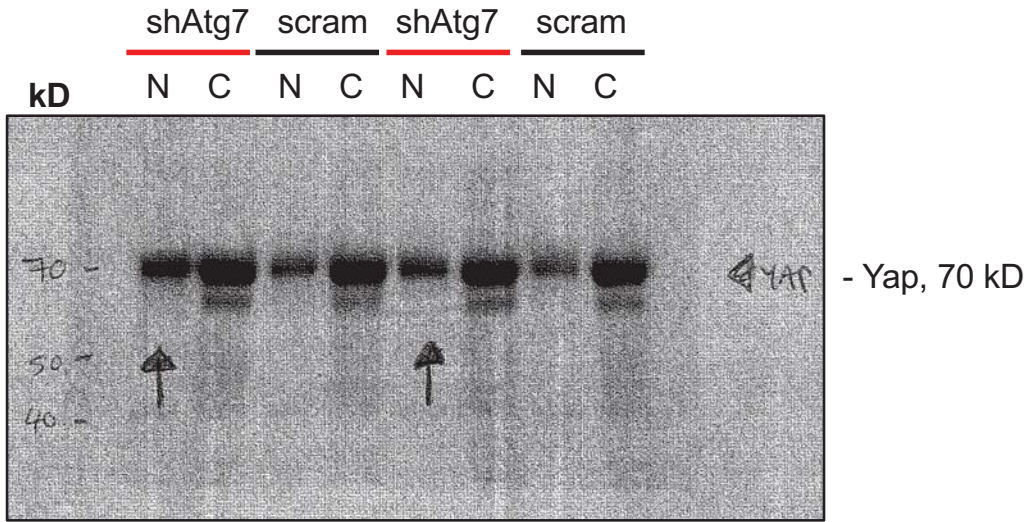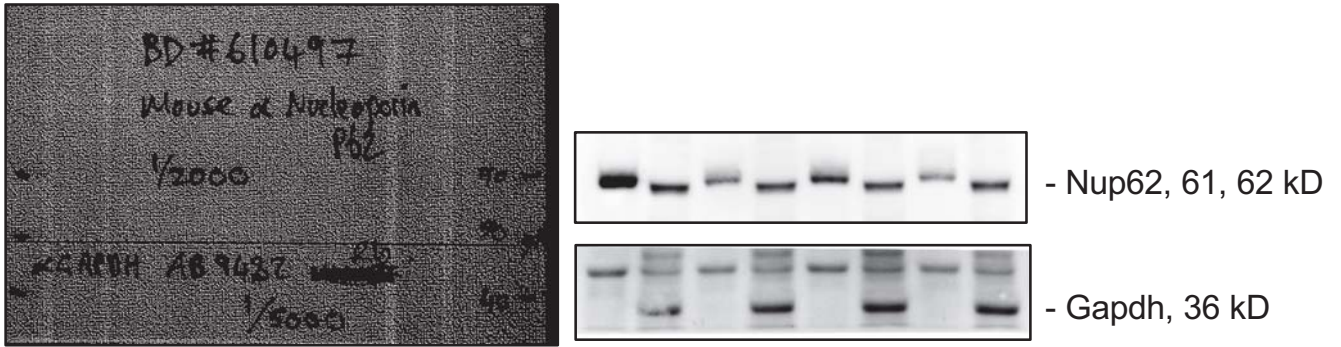

Supplementary Information – uncropped Immunoblots

IB Figure 2E

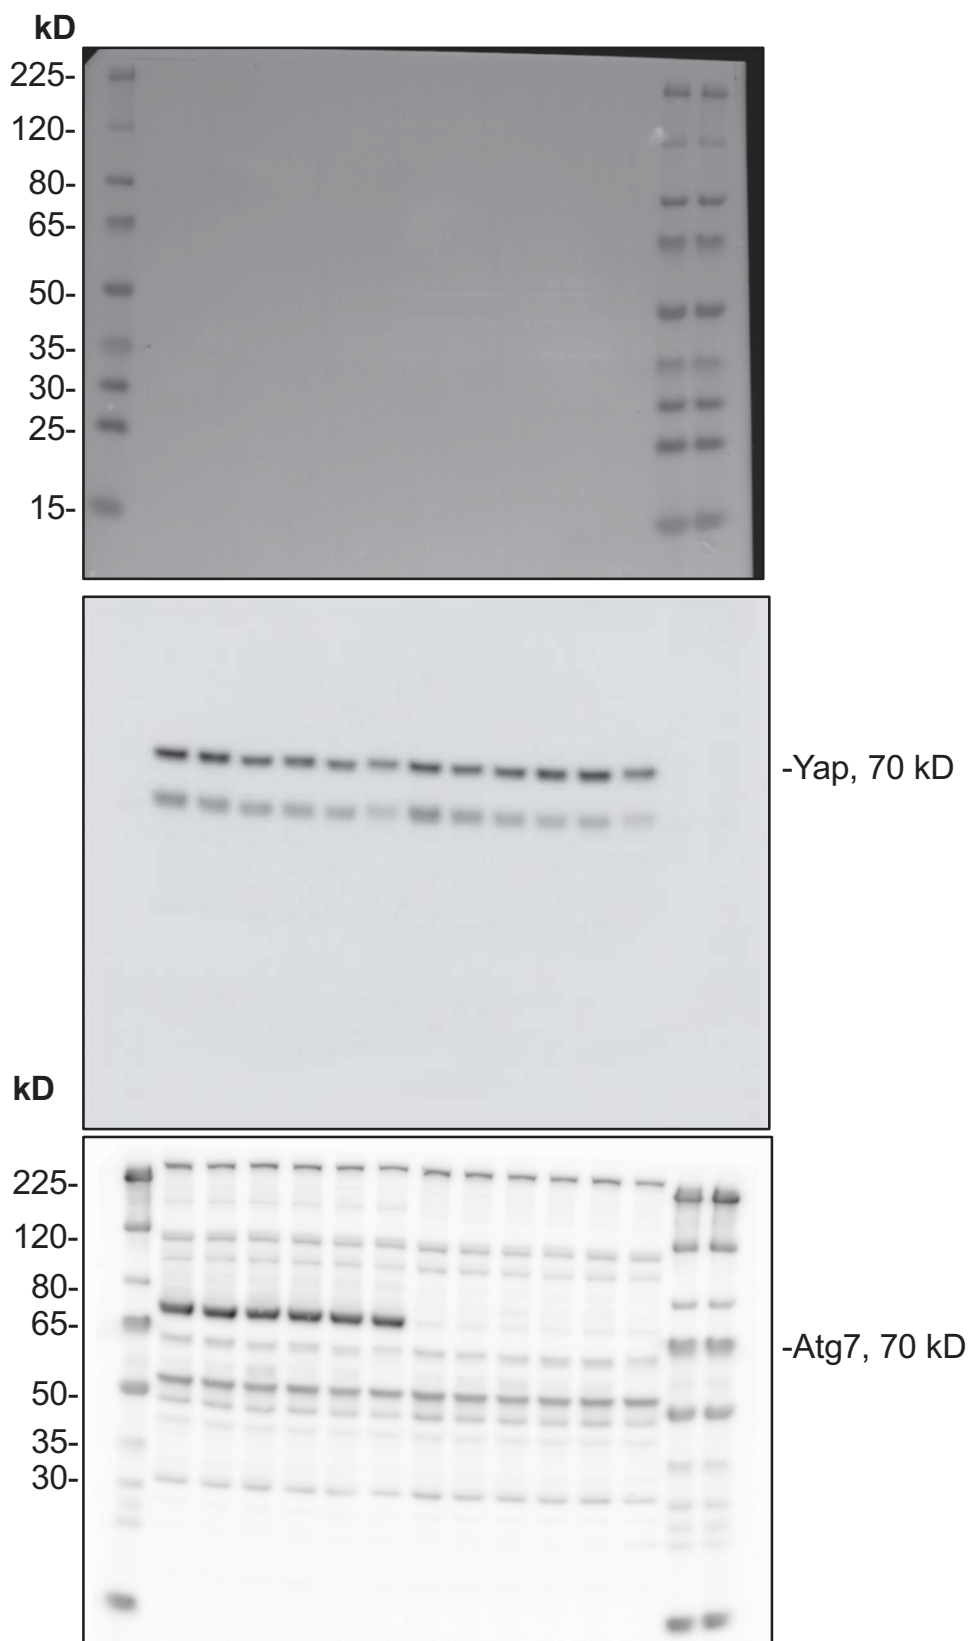



Supplementary Information – uncropped Immunoblots

IB Figure 2E continued

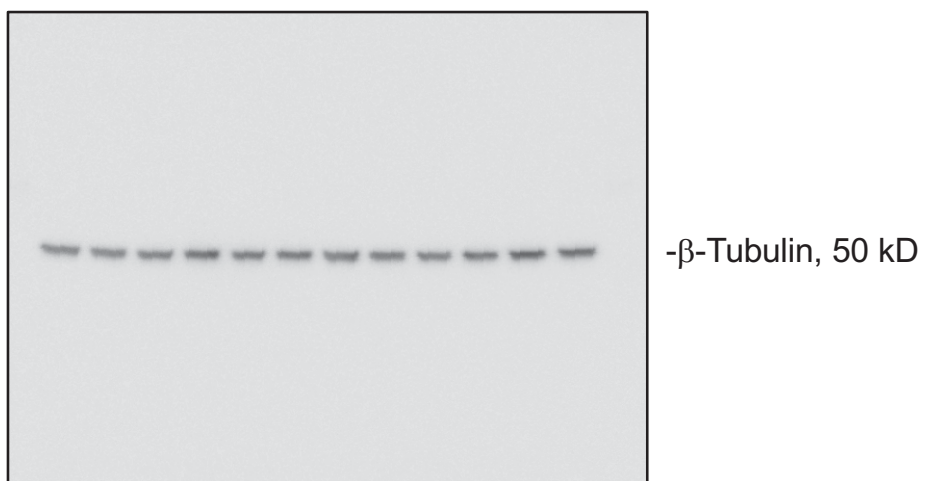

Supplementary Information – uncropped Immunoblots

IB Figure 2G

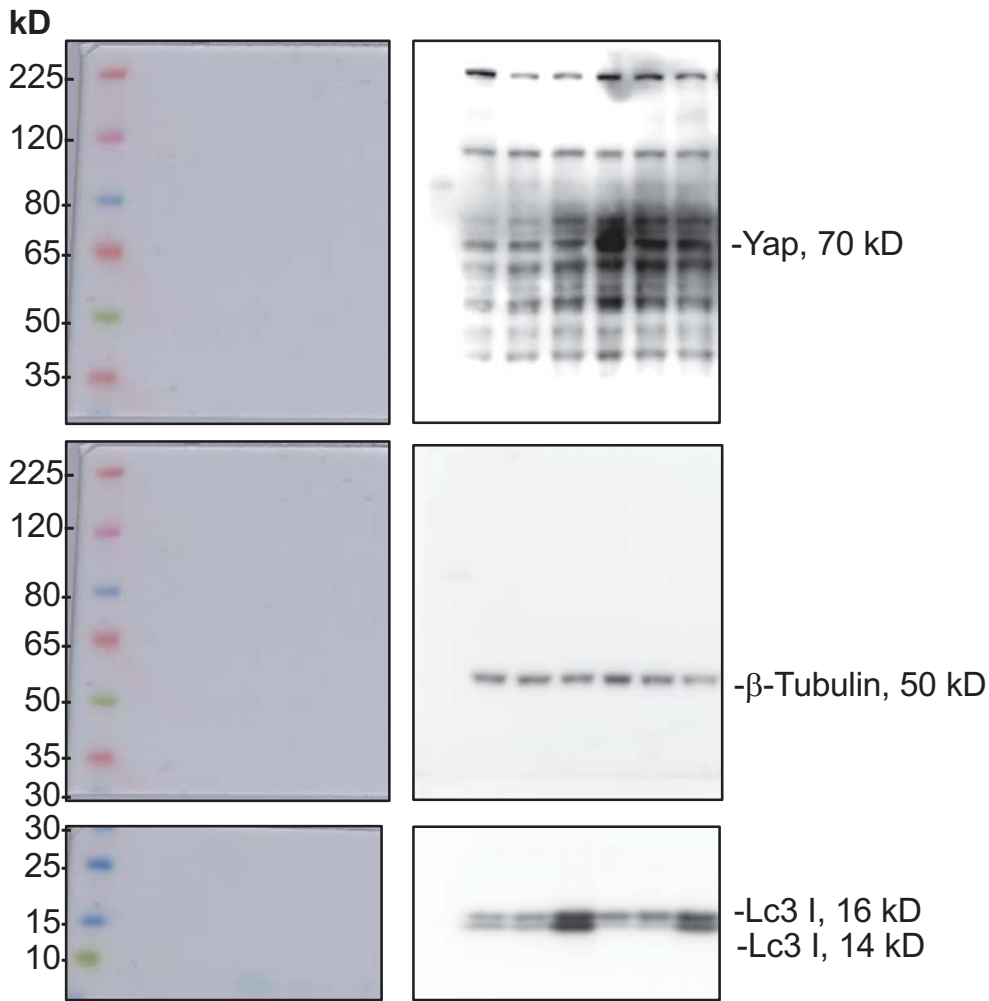

Supplementary Information – uncropped Immunoblots

IB Figure 4 B

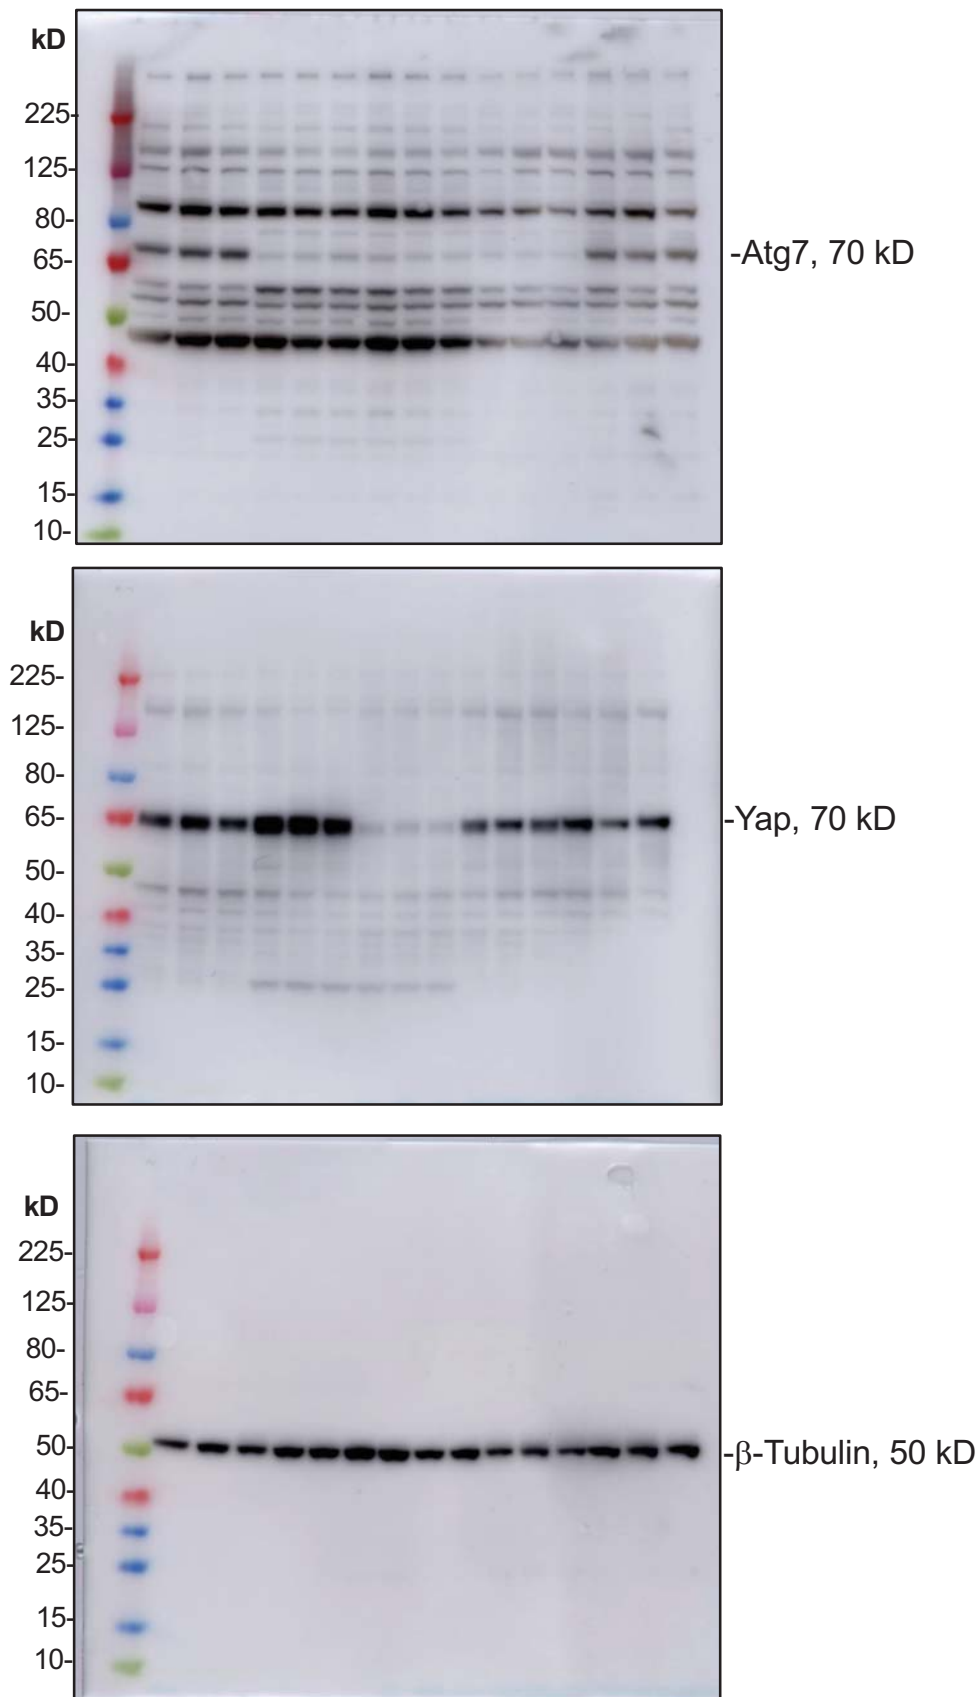

## Supplementary Information – uncropped Immunoblots

### IB Figure 4 B

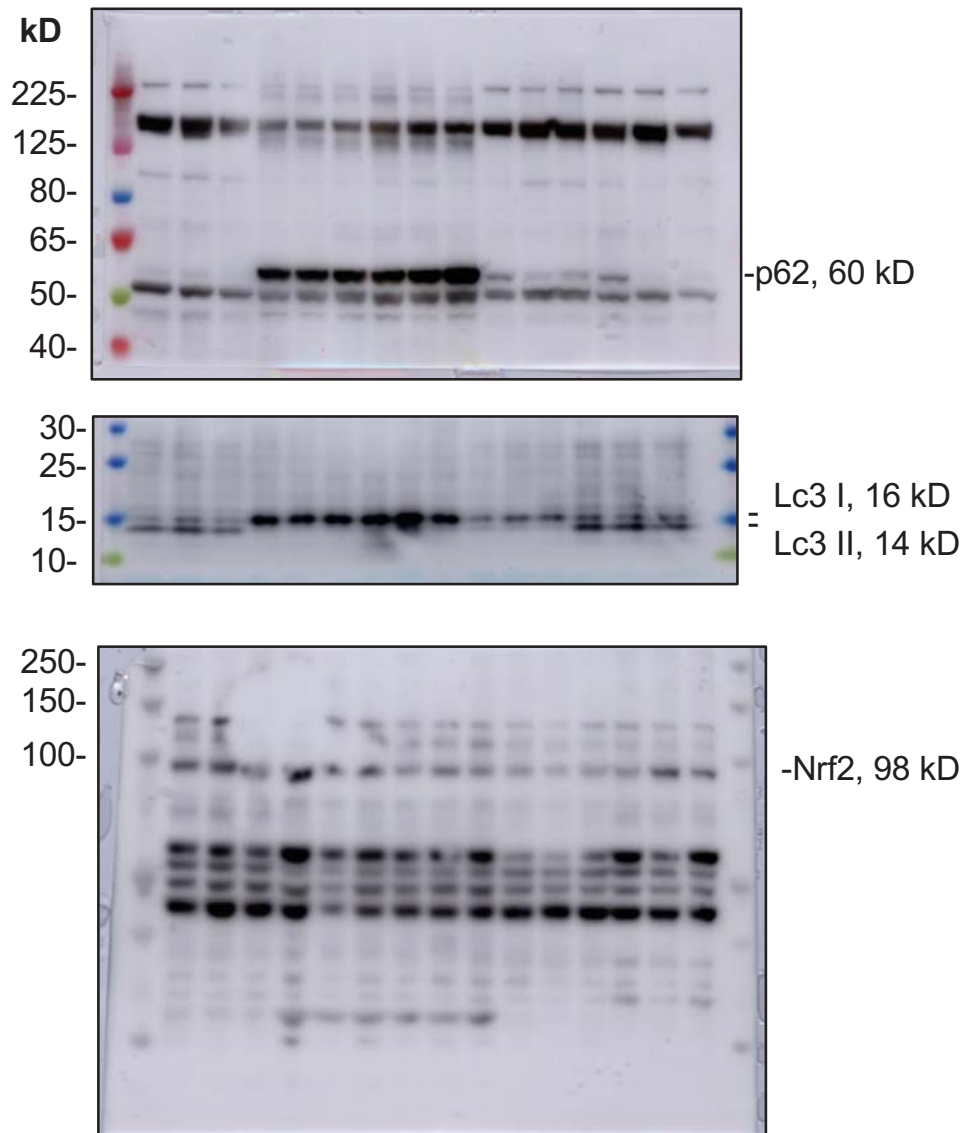

Supplementary Information – uncropped Immunoblots

IB Supplementary Fig. 3D

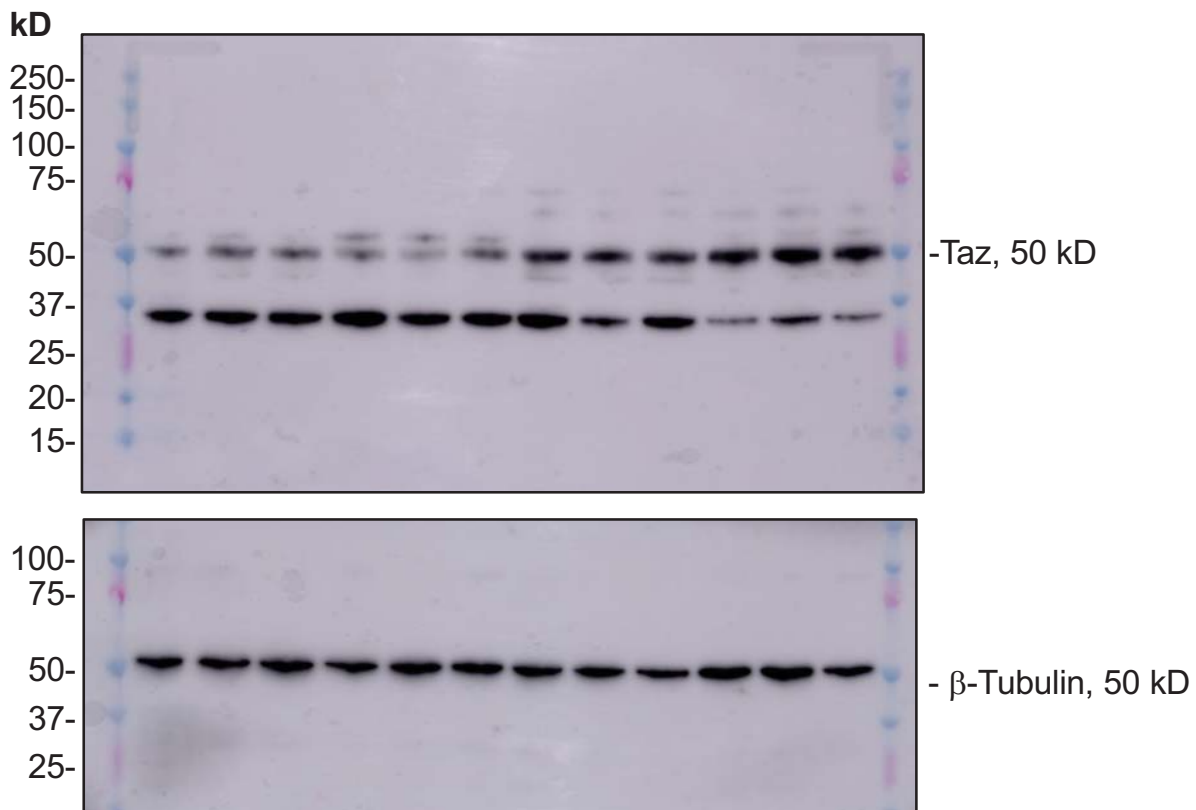



## Supplementary Information – uncropped Immunoblots

### IB Supplementary Fig. 4C

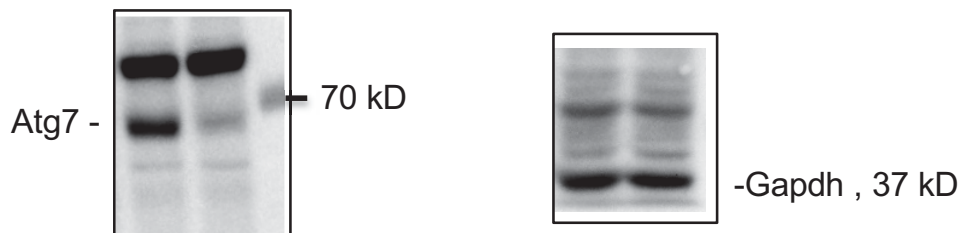

### IB Supplementary Fig. 4E

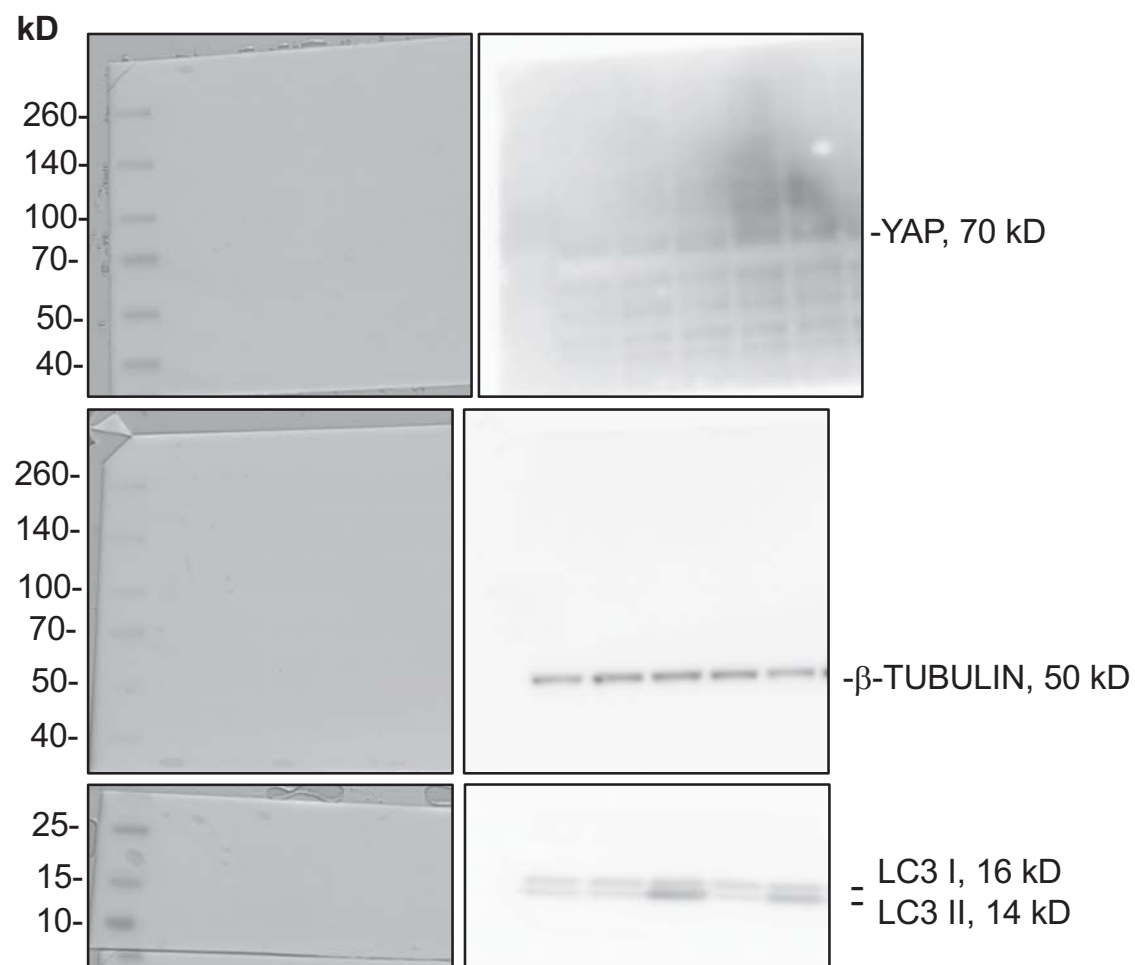

# Supplementary Information – uncropped Immunoblots

## IB Supplementary Fig. 4J

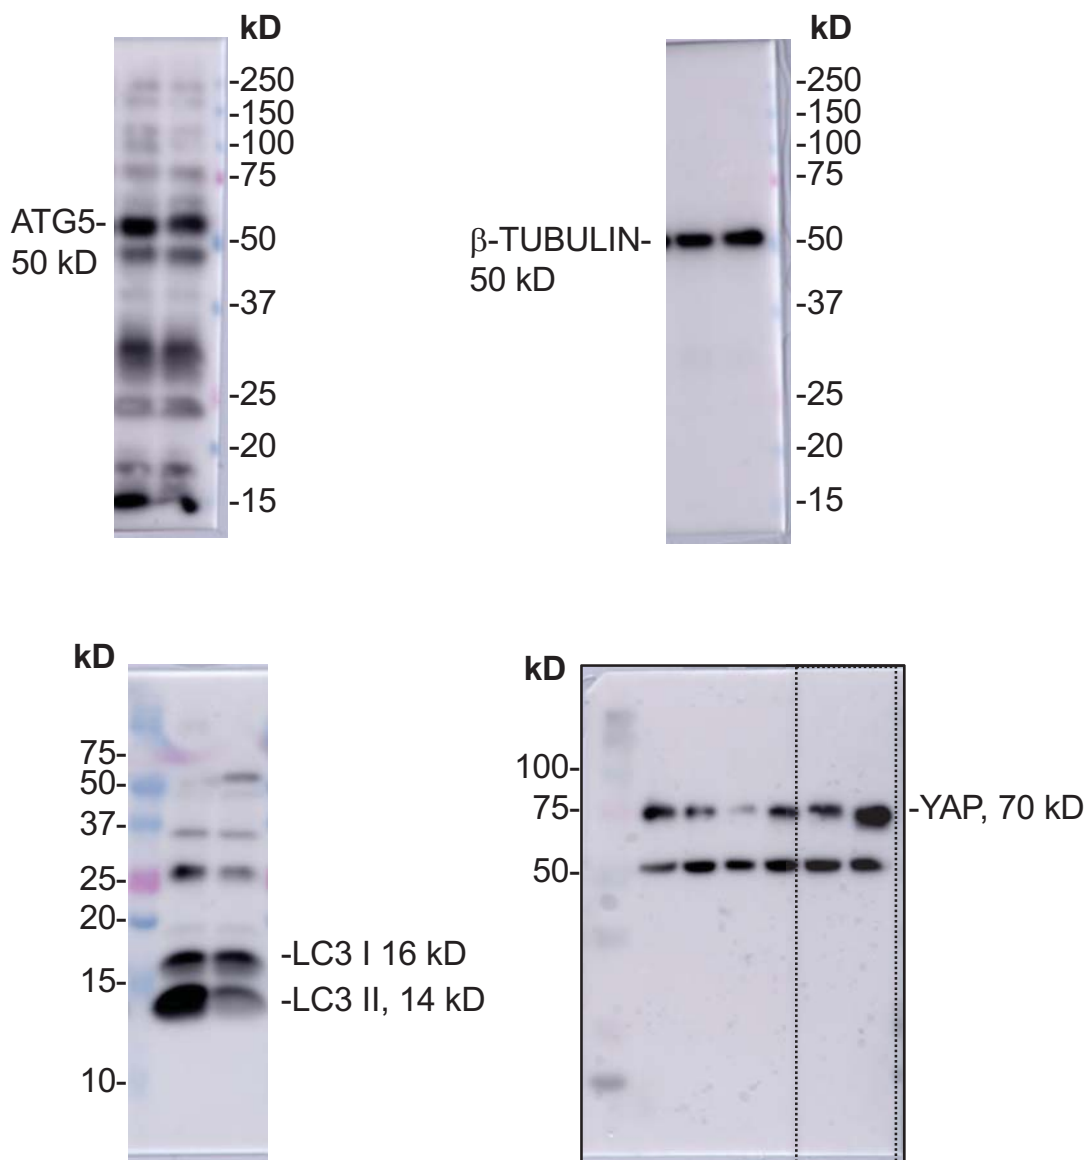

**Supplementary Table 1. Antibodies for Immunohistochemistry and Immunoblotting.**

IB, immunoblotting; IHC, immunohistochemistry; IF, immunofluorescence.

| Antibody                   | species | application | dilution | cat. Number | manufacturer   |
|----------------------------|---------|-------------|----------|-------------|----------------|
| Yap                        | rabbit  | IB          | 1:1000   | 4912        | cell signaling |
|                            |         | IHC         | 1:500    |             |                |
| Yap                        | rabbit  | IB          | 1:1000   | 14074       | cell signaling |
|                            |         | IHC         | 1:500    |             |                |
| Taz                        | rabbit  | IB          | 1:1000   | HPA007415   | Sigma          |
|                            |         | IHC         | 1:500    |             |                |
| Ki67                       | rabbit  | IHC         | 1:10000  | 15580       | abcam          |
| p62/SQSTM1                 | rabbit  | IB          | 1:4000   | PM045       | MBL            |
|                            |         | IHC         | 1:4000   |             |                |
| Atg7                       | rabbit  | IB          | 1:1000   | A2856       | Sigma          |
| Yap/Taz                    | rabbit  | IB          | 1:1000   | 8418        | cell signaling |
| P-Yap (S127)               | rabbit  | IB          | 1:1000   | 4911        | cell signaling |
| $\beta$ -tubulin           | mouse   | IB          | 1:10000  | T4026       | Sigma          |
| $\beta$ -catenin           | mouse   | IB          | 1:1000   | 610153      | BD biosciences |
| F4/80                      | rat     | IHC         | 1:100    | 14-4801-82  | ebioscience    |
| Gapdh                      | mouse   | IB          | 1:10000  | ab9484      | Abcam          |
| Cleaved Caspase 3 (Asp175) | rabbit  | IHC         | 1:300    | 9661        | cell signaling |
| HNF4 $\alpha$              | goat    | IHC         | 1:1000   | sc-6556     | Santa Cruz     |
| Gst1                       | rabbit  | IHC         | 1:500    | ab16802     | Abcam          |
| Nrf2                       | rabbit  | IB          | 1:1000   | 12721       | Cell signaling |
| Epcam                      | rat     | IF          | 1:100    | 130-102-033 | ebiosciences   |
| Cd133                      | rat     | IF          | 1:100    | 11-1331-82  | ebiosciences   |
| Cd44                       | rat     | IF          | 1:100    | 550538      | BD Pharmingen  |
| LC3                        | rabbit  | IB          | 1:1000   | ab48394     | Abcam          |
| Atg5                       | rabbit  | IB          | 1:1000   | 2630        | Cell signaling |
| Nucleoporin p62            | mouse   | IB          | 1:1000   | 610497      | BD Biosciences |

**Supplementary Table 2. qRT-PCR primer sequences.**

| <b>Gene</b>    | <b>species</b> | <b>Forward Primer</b>     | <b>Reverse Primer</b>    |
|----------------|----------------|---------------------------|--------------------------|
| <i>Gapdh</i>   | mouse          | CAATGACCCCTTCATTGACC      | GATCTCGCTCCTGGAAGATG     |
| <i>Afp</i>     | mouse          | AGTTTCCAGAACCTGCCGAG      | ACCTTGTCGTACTIONGAGCAGC  |
| <i>Areg</i>    | mouse          | TTGCTGCTGGTCTTAGGCTC      | TGGTCCCCAGAAAGCGATTC     |
| <i>Birc5</i>   | mouse          | TGCAAAGGAGACCAACAACA      | GGCATGTCACTIONCAGGTCCAA  |
| <i>Ctgf</i>    | mouse          | AGAACTIONGTGTACGGAGCGTG   | GTGCACCATCTTTGGCAGTG     |
| <i>Gli2</i>    | mouse          | GGGCATCCTCTCTGCTGTTT      | CCCTCTTTGGGCGTGTACTT     |
| <i>Itgb2</i>   | mouse          | GCTTTGGGTCGTTTGTGGAC      | TGCCGACCTCTGTCTGAAAC     |
| <i>Atg7</i>    | mouse          | TGGCTGCTACTIONTCTGCAATGAT | CAGGACAGAGACCATCAGCTCC   |
| <i>Pcna</i>    | mouse          | ATCCTGAAGAAGGTGCTGGAGGCT  | ACGAGTCCATGCTCTGCAGGTTCA |
| <i>Cyr61</i>   | mouse          | AGAGGCTTCCTGTCTTTGGC      | CCAAGACGTGGTCTGAACGA     |
| <i>Albumin</i> | mouse          | CCCCTIONTAGCCTCTGGCAAAA   | ACACACCCCTGGAAAAAGCA     |
| <i>18s</i>     | mouse          | GCAATTATTCCCCATGAACG      | GGGACTTAATCAACGCAAGC     |
| <i>Axin2</i>   | mouse          | CCTGACCAAACAGACGACGA      | CACCTCTGCTGCCACAAAAC     |
| <i>Yap</i>     | mouse          | CAGAGCCCACAGGGAGGCGT      | GCTGCGCAGAGCTAATTCCTGACA |
| <i>Taz</i>     | mouse          | CAGCTCCACTIONTTTCGGCCCCG  | TTATCCCCGGAACCGGCCTC     |
| <i>Cd133</i>   | mouse          | TCAGTTGATTCCAAGGAGATTGCC  | GCAGCCCACCAGAGGCATGA     |
| <i>Cd44</i>    | mouse          | TCAGGAGCCCACAACGAG        | GCTCCCAGCCTGTTGGGTT      |
| <i>Epcam</i>   | mouse          | TACGACCCCGACTIONGCGACGA   | CGGACTCCGGCGGTGTTGAC     |
| <i>Tbp</i>     | mouse          | CACCCCTTGTACCCTTCAC       | CAGTTGTCCGTGGCTCTCTT     |
| <i>β-actin</i> | mouse          | TGATCCACATCTGCTGGA        | GAAGAGCTACGAGCTGCC       |
