# Supplementary material for: Autophagy is a gatekeeper of hepatic differentiation and carcinogenesis by controlling the degradation of Yap
Source: PubMed Central journal article supplement (PMC6251897; doi:10.1038/s41467-018-07338-z), 2018-11-23
Supplement: 41467_2018_7338_MOESM4_ESM.pdf [file 41467_2018_7338_MOESM4_ESM.pdf]

Addendum to Reporting Summary Lee et al final.

Describe the validation of each primary antibody for the species and application noting any validation statements on the manufacturers website, relevant citations, antibody profiles in online databases and data provided in the manuscript.

| Antibody | species | application | dilution | cat. Number | manufacturer   | Validation statement on man. website                                                                                                                                     | Relevant citations                                                                                                                                                                                               | Data provided in the manuscript | Other means                                                                                                                                    |
|----------|---------|-------------|----------|-------------|----------------|--------------------------------------------------------------------------------------------------------------------------------------------------------------------------|------------------------------------------------------------------------------------------------------------------------------------------------------------------------------------------------------------------|---------------------------------|------------------------------------------------------------------------------------------------------------------------------------------------|
| Yap      | rabbit  | IB          | 1:1000   | 4912        | cell signaling | YAP Antibody detects endogenous levels of total YAP protein. Western blot analysis on extracts from NIH/3T3, C6, MDA-MB-231                                              | <ol style="list-style-type: none"> <li>1. Zhu, B et al. <u>Sci Rep.</u> 2018 Aug 29;8(1):13025.</li> <li>2. Hsu, PC et al. <u>J Cell Mol Med.</u> 2018 Jun;22(6):3073-3085.</li> </ol>                           |                                 | Testing of transiently Yap transfected THLE5B cells (addgene 19057, addgene 19045). Data not included in manuscript but available upon request |
|          |         | IHC         | 1:500    | 4912        | cell signaling | IHC of paraffin-embedded human breast carcinoma, human prostate carcinoma showing cytoplasmic and nuclear localization, using YAP Antibody.                              | <ol style="list-style-type: none"> <li>1. Shen, J et al. <u>Journal of Experimental &amp; Clinical Cancer Research</u> (2018) 37:175</li> <li>2. Zhu, B et al. <u>Sci Rep.</u> 2018 Aug 29;8(1):13025</li> </ol> |                                 |                                                                                                                                                |
| Yap      | rabbit  | IB          | 1:1000   | 14074       | cell signaling | YAP (D8H1X) XP® Rabbit mAb recognizes endogenous levels of total YAP protein. Western blot analysis of extracts from various cell lines using YAP (D8H1X) XP® Rabbit mAb | <ol style="list-style-type: none"> <li>1. Mou, K et al. <u>Oncology Reports</u> 40: 2056-2066, 2018.</li> <li>2. Kato, K et al. <u>Nat Commun.</u> 2018 Jun 22;9(1):2448.</li> </ol>                             |                                 | Testing of transiently Yap transfected THLE5B cells (addgene 19057, addgene 19045). Data not included in manuscript                            |

Addendum to Reporting Summary Lee et al final.

|      |        |     |             |               |                   |                                                                                                                                                                                                           |                                                                                                                                                                                                  |                                                                                             |                                                                                                      |
|------|--------|-----|-------------|---------------|-------------------|-----------------------------------------------------------------------------------------------------------------------------------------------------------------------------------------------------------|--------------------------------------------------------------------------------------------------------------------------------------------------------------------------------------------------|---------------------------------------------------------------------------------------------|------------------------------------------------------------------------------------------------------|
|      |        |     |             |               |                   |                                                                                                                                                                                                           | 2018 Jun<br>22;9(1):2448.                                                                                                                                                                        |                                                                                             | but available<br>upon<br>request.                                                                    |
|      |        | IHC | 1:500       | 14074         | cell<br>signaling | IHC of paraffin-<br>embedded human<br>breast<br>adenocarcinoma,<br>ovarian serous<br>carcinoma, human<br>benign prostatic<br>hyperplasia,<br>PANC1, RL-7 cell<br>pellets.                                 | 1. Chibly, AM et<br>al. <u>Sci Rep.</u><br>2018 Apr<br>20;8(1):6347.                                                                                                                             |                                                                                             |                                                                                                      |
| Taz  | rabbit | IB  | 1:1000      | HPA0074<br>15 | Sigma             | Western blot<br>analysis of EFO-21<br>cells transfected<br>with control siRNA,<br>target specific<br>probe #1 and #2<br>for enhanced<br>validation of RNAi<br>knockdown.<br>Loading control<br>was equal. | 1. Di Agostino, S<br>et al. <u>EMBO<br/>Rep.</u> 2016<br>Feb;17(2):188-<br>201.<br>1. Gruber, R et al.<br><u>Gastroenterolo<br/>gy.</u> 2016<br>Sep;151(3):526<br>-39.                           | band at expected<br>molecular weight in<br>liver lysates. Data<br>included in<br>manuscript | band at<br>expected<br>molecular<br>weight in<br>liver lysates.<br>Data<br>included in<br>manuscript |
|      |        | IHC | 1:500       | HPA0074<br>15 | Sigma             | IHC staining of<br>different human<br>tissues such as<br>placenta, kidney,<br>renal cancer,<br>colon, and skeletal<br>muscle.                                                                             | 1. Slemmons, KK<br>et al. <u>PLoS<br/>One.</u> 2015 Oct<br>23;10(10):<br>e0140781.<br>2. Liu, F et al. <u>Am<br/>J Physiol Lung<br/>Cell Mol<br/>Physiol.</u> 2015<br>Feb 15;308(4):<br>L344-57. |                                                                                             |                                                                                                      |
| Ki67 | rabbit | IHC | 1:1000<br>0 | 15580         | abcam             | Ab15580 is batch<br>tested in ICC/IHC.<br><br>IHC image<br>ab15580 staining in<br>mouse spleen<br>FFPE tissue<br>section.                                                                                 | 1. Boddaert, J et<br>al. <u>PLoS One.</u><br>2018 Jan<br>17;13(1):e0186<br>937.<br>2. Smith, MD et<br>al. <u>Dev Cell.</u><br>2018 Jan                                                           |                                                                                             | Highly<br>specific<br>nuclear<br>staining in<br>mouse liver<br>tissue. IHC<br>tested in<br>mouse     |

Addendum to Reporting Summary Lee et al final.

|            |        |     |        |       |     |                                                                                                                                                                                                                                                                                                                                                                                                                                    |                                                                                                                                                                                                                                                                                                         |                                                                                                                     |                                                                                                                                                                             |
|------------|--------|-----|--------|-------|-----|------------------------------------------------------------------------------------------------------------------------------------------------------------------------------------------------------------------------------------------------------------------------------------------------------------------------------------------------------------------------------------------------------------------------------------|---------------------------------------------------------------------------------------------------------------------------------------------------------------------------------------------------------------------------------------------------------------------------------------------------------|---------------------------------------------------------------------------------------------------------------------|-----------------------------------------------------------------------------------------------------------------------------------------------------------------------------|
|            |        |     |        |       |     |                                                                                                                                                                                                                                                                                                                                                                                                                                    | 22;44(2):217-232.e11.                                                                                                                                                                                                                                                                                   |                                                                                                                     | models with high hepatic regeneration (partial hepatectomy). Good correlation to BrdU staining and PCNA (unpublished results, not in manuscript but available upon request) |
| p62/SQSTM1 | rabbit | IB  | 1:4000 | PM045 | MBL | Antibody is validated for multiple applications (WB, IHC, ICC and IP) and is widely cited, including in research papers with more than 200 citations (Waguri S, Komatsu M. Biochemical and morphological detection of inclusion bodies in autophagy-deficient mice. <i>Methods Enzymol.</i> 453, 181-96 (2009)). This is a polyclonal antibody of 100 ul that is raised in rabbit and is reactive with human, hamster, mouse, rat. | <ol style="list-style-type: none"> <li>1. Frankel, LB et al. <u>EMBO J.</u> 2011 Sep 13;30(22):4628-41.</li> <li>2. Lee, EJ &amp; Tournier, C. <u>Autophagy.</u> 2011 Jul;7(7):689-95. Epub 2011 July 1.</li> <li>3. Waguri, S &amp; Komatsu, M. <i>Methods Enzymol.</i> 453, 181-96 (2009).</li> </ol> | Band at expected molecular weight. Increase in positive controls (livers with autophagy impairment/Atg7 ko livers). |                                                                                                                                                                             |
|            |        | IHC | 1:4000 | PM045 | MBL | Antibody is validated for multiple                                                                                                                                                                                                                                                                                                                                                                                                 | <ol style="list-style-type: none"> <li>1. Waguri, S &amp; Komatsu, M. <i>Methods</i></li> </ol>                                                                                                                                                                                                         | Very typical staining in liver tissue of Atg7 KO mice, identical to                                                 |                                                                                                                                                                             |

Addendum to Reporting Summary Lee et al final.

|         |        |    |        |       |                |                                                                                                                                                                                                                                                                                                                                                                                                 |                                                                                            |                                                                                                         |                                      |
|---------|--------|----|--------|-------|----------------|-------------------------------------------------------------------------------------------------------------------------------------------------------------------------------------------------------------------------------------------------------------------------------------------------------------------------------------------------------------------------------------------------|--------------------------------------------------------------------------------------------|---------------------------------------------------------------------------------------------------------|--------------------------------------|
|         |        |    |        |       |                | applications (WB, IHC, ICC and IP) and is widely cited, including in research papers with more than 200 citations (Waguri S, Komatsu M. Biochemical and morphological detection of inclusion bodies in autophagy-deficient mice. <i>Methods Enzymol.</i> 453, 181-96 (2009)). This is a polyclonal antibody of 100 ul that is raised in rabbit and is reactive with human, hamster, mouse, rat. | Enzymol. 453, 181-96 (2009).                                                               | previously published papers (Inami et al, 2011 <i>J Cell Biol</i> , 193(2):275.)                        |                                      |
| Atg7    | rabbit | IB | 1:1000 | A2856 | Sigma          | Anti-Atg7 recognizes human, mouse, and rat Atg7 by immunoblotting (~75 kDa), immunoprecipitation and immunohistochemistry. Western blot analysis of whole mouse 3T3 cell extract was separated on SDS-PAGE and blotted with Rabbit Anti-ATG7.                                                                                                                                                   | 1. Michiels, CF et al. <i>Am J Physiol Heart Circ Physiol.</i> 2015 Mar 15;308(6):H557-67. | Band at expected molecular weight in IB. Loss of band in Atg7 KO mice. Data included in the manuscript. |                                      |
| Yap/Taz | rabbit | IB | 1:1000 | 8418  | cell signaling | Western blot analysis of extracts from various cell lines using                                                                                                                                                                                                                                                                                                                                 | 1. Hernandez, C et al. <i>J Clin Invest.</i> 2018 Jun                                      |                                                                                                         | Bands at expected molecular weights. |

Addendum to Reporting Summary Lee et al final.

|                 |        |    |             |       |                   | YAP/TAZ (D24E4)<br>Rabbit mAb.                                                                                                                                                                                                                                                                                                                    | 1;128(6):2436-<br>2451.                                                                                                                                                                              |                                                                     | Data<br>available on<br>request. |
|-----------------|--------|----|-------------|-------|-------------------|---------------------------------------------------------------------------------------------------------------------------------------------------------------------------------------------------------------------------------------------------------------------------------------------------------------------------------------------------|------------------------------------------------------------------------------------------------------------------------------------------------------------------------------------------------------|---------------------------------------------------------------------|----------------------------------|
| P-Yap<br>(S127) | rabbit | IB | 1:1000      | 4911  | cell<br>signaling | Western blot analysis of extracts from MDA-MB-468 cells, untreated or treated with wortmannin and LY294002, using Phospho-YAP (Ser127) Antibody. The phospho-specificity of the antibody was validated by treating the membrane with (+) or without (-) calf intestinal phosphatase (CIP) after western transfer.                                 | <ol style="list-style-type: none"> <li>1. Zhu, B et al. <u>Sci Rep.</u> 2018 Aug 29;8(1):13025.</li> <li>2. Yao, F et al. <u>Nat Commun.</u> 2018 Jun 11;9(1):2269.</li> </ol>                       | Band at expected molecular weight. Data included in the manuscript. |                                  |
| Beta-tubulin    | mouse  | IB | 1:1000<br>0 | T4026 | Sigma             | It localizes b-tubulin in human, bovine, rat, mouse, sea urchin, and plant b-tubulin. It recognizes all five isoforms of b-tubulin (b1-b5), and may be used in immunoblotting, 2-dimensional electrophoresis, sperm motility, and immunohistochemistry. It is immunospecific for tubulin as determined by indirect immunofluorescent staining and | <ol style="list-style-type: none"> <li>1. Lecat, A et al. <u>J Biol Chem.</u> 2012 Aug 24;287(35):29213-26.</li> <li>2. Tarazona, R et al. <u>J Immunol.</u> 2000 Dec 15;165(12):6776-82.</li> </ol> | Band at expected molecular weight. Data included in the manuscript. | .                                |

Addendum to Reporting Summary Lee et al final.

|              |       |     |         |            |                |                                                                                                                                                                                                                                                                                                                                                                                                                      |                                                                                                                                          |                                                                          |
|--------------|-------|-----|---------|------------|----------------|----------------------------------------------------------------------------------------------------------------------------------------------------------------------------------------------------------------------------------------------------------------------------------------------------------------------------------------------------------------------------------------------------------------------|------------------------------------------------------------------------------------------------------------------------------------------|--------------------------------------------------------------------------|
|              |       |     |         |            |                | immunoblotting procedures.                                                                                                                                                                                                                                                                                                                                                                                           |                                                                                                                                          |                                                                          |
| Beta-catenin | mouse | IHC | 1:1000  | 610153     | BD biosciences | Antibody is routinely tested by western blot. IHC, IF and IP were tested during development.                                                                                                                                                                                                                                                                                                                         | 1. Tateishi, K et al. <u>J Cell Biol.</u> 2001; 155(4):571-579.                                                                          |                                                                          |
| F4/80        | rat   | IHC | 1:100   | 14-4801-82 | ebioscience    | The BM8 antibody has been reported for use in flow cytometric analysis, immunohistochemical staining of frozen tissue sections, and immunohistochemical staining of paraffin embedded tissue sections. The BM8 antibody has been tested by flow cytometric analysis of mouse spleen or bone marrow cells. The BM8 antibody has been tested by immunohistochemistry of formalin-fixed paraffin embedded mouse tissue. | 1. Diaconu, I et al. <u>Cancer Res.</u> 2012 May 1;72(9):2327-38.<br>2. Ying, W et al. <u>J Clin Invest.</u> 2015 Nov 2;125(11):4149-59. | Validated antibody in flow analysis with other markers for Kupffer cells |
| Gapdh        | mouse | IB  | 1:10000 | ab9484     | Abcam          | Our Abpromise guarantee covers the use of <b>ab9484</b> in the following tested applications: WB, IHC-P, Flow cytometry.                                                                                                                                                                                                                                                                                             | 1. Krysiak J et al. <u>Nat Commun.</u> 2018 Jan 17;9(1):262.<br>2. Zhang, XL et al. <u>Oncol Lett.</u> 2018 Apr;15(4):6003-6008.         | Band at expected molecular weight                                        |

Addendum to Reporting Summary Lee et al final.

|                            |        |     |        |         |                |                                                                                                                                                                                                                                                                                                                               |                                                                                                                                                                                                     |                                                                                                                                                         |
|----------------------------|--------|-----|--------|---------|----------------|-------------------------------------------------------------------------------------------------------------------------------------------------------------------------------------------------------------------------------------------------------------------------------------------------------------------------------|-----------------------------------------------------------------------------------------------------------------------------------------------------------------------------------------------------|---------------------------------------------------------------------------------------------------------------------------------------------------------|
| Cleaved Caspase 3 (Asp175) | rabbit | IHC | 1:300  | 9661    | cell signaling | Western blot analysis of extracts from HeLa, NIH/3T3 and C6 cells untreated, staurosporine-treated (3hrs, 1 $\mu$ M in vivo) or cytochrome c-treated (1hr, 0.25 mg/ml in vitro). Immunohistochemical analysis of paraffin-embedded mouse embryo, using Cleaved Caspase-3 (Asp175) Antibody preincubated with control peptide. | <ol style="list-style-type: none"> <li>1. Beug St, et al. <u>Mol Ther Oncolytics</u>. 2018 Jun 21;10:28-39.</li> <li>2. Meyer, A et al. <u>Front Integr Neurosci</u>. 2018 Aug 14;12:35.</li> </ol> |                                                                                                                                                         |
| HNF4alpha                  | goat   | IHC | 1:1000 | sc-6556 | Santa Cruz     | Recommended for detection of HNF-4 $\alpha$ of mouse, rat and human origin by WB, IP, IF and ELISA; also reactive with additional species, including and equine, canine, bovine and porcine.                                                                                                                                  | <ol style="list-style-type: none"> <li>1. Alpern, D et al. <u>Elife</u>. 2014 Sep 10;3:e03613.</li> </ol>                                                                                           | Validated by immunoblotting: Band at expected molecular weight. In IHC typical nuclear staining of hepatocytes (can be identified without co-staining). |
| Gst1                       | rabbit | IHC | 1:500  | Ab16802 | Abcam          | Our Abpromise guarantee covers the use of ab16802 in the following tested applications: ICC/IF, IHC-Fr, WB, In-cell ELISA, and IHC-FoFr.                                                                                                                                                                                      | <ol style="list-style-type: none"> <li>1. Orr, AG et al. <u>Nat Neurosci</u>. 2015 Mar;18(3):423-34.</li> <li>2. Burkovetskaya, M et al. <u>PLoS One</u>. 2014 Apr</li> </ol>                       | Validation by IHC only. Typical strong staining in centrilobular region                                                                                 |

Addendum to Reporting Summary Lee et al final.

|       |        |           |        |             |                 |                                                                                                                                                                                                                                                                      |                                                                                                                                                                                                          |  |                                                                                                                 |
|-------|--------|-----------|--------|-------------|-----------------|----------------------------------------------------------------------------------------------------------------------------------------------------------------------------------------------------------------------------------------------------------------------|----------------------------------------------------------------------------------------------------------------------------------------------------------------------------------------------------------|--|-----------------------------------------------------------------------------------------------------------------|
|       |        |           |        |             |                 |                                                                                                                                                                                                                                                                      | 15;9(4):e95023                                                                                                                                                                                           |  |                                                                                                                 |
| Nrf2  | rabbit | <u>IB</u> | 1:1000 | 12721       | Cell signaling  | Western blot analysis of extracts from MEF wt and U-2 OS cells, untreated (-) or treated with MG-132 #2194 (10 µM, 10 hr; +).                                                                                                                                        | <ol style="list-style-type: none"> <li>Xue, X et al. <u>Proc Natl Acad Sci U S A.</u> 2017 Nov 7;114(45):E9608-E9617.</li> <li>Liu, S et al. <u>Oncotarget.</u> 2018 Jan 3;9(14):11528-11540.</li> </ol> |  | MG132 treatment to increase Nrf2 expression in cultured cells. Data available upon request.                     |
| Epcam | rat    | IF        | 1:100  | 130-102-033 | Miltenyi Biotec | Immunofluorescent microscopic images of fixed mouse embryonic stem cells (HM1) cultured on feeder cells: cells were fixed in PFA and stained with CD326 (EpCAM)-Biotin overnight at 4 °C. Detection of CD326 (EpCAM)-Biotin was performed with a secondary antibody. |                                                                                                                                                                                                          |  | Data validated by flow analysis of dissociated single cell liver. Data not included but available upon request. |
| Cd133 | rat    | IF        | 1:100  | 11-1331-82  | ebiosciences    | Published figure using CD133 (Prominin-1) monoclonal antibody ( <u>Product # 11-1331-82</u> ).                                                                                                                                                                       | <ol style="list-style-type: none"> <li>Miller, Te et al. <u>PLoS One.</u> 2014 Dec 10;9(12):e114433.</li> </ol>                                                                                          |  | Data validated by flow analysis of dissociated single cell liver. Data not included but available upon request. |
| Cd44  | rat    | IF        | 1:100  | 550538      | BD Pharmingen   | The IM7 antibody specifically                                                                                                                                                                                                                                        |                                                                                                                                                                                                          |  | Data validated by                                                                                               |



Addendum to Reporting Summary Lee et al final.

|                 |        |    |        |         |                |                                                                                                                                                                                                                                                                                                                  |                                                                     |                                                                                                                                                                                                                                                         |                                                                                               |
|-----------------|--------|----|--------|---------|----------------|------------------------------------------------------------------------------------------------------------------------------------------------------------------------------------------------------------------------------------------------------------------------------------------------------------------|---------------------------------------------------------------------|---------------------------------------------------------------------------------------------------------------------------------------------------------------------------------------------------------------------------------------------------------|-----------------------------------------------------------------------------------------------|
|                 |        |    |        |         |                | recognizes an epitope on both alloantigens and all isoforms of the CD44 glycoprotein (Pgp-1, Ly-24). Antibody routinely tested in Flow cytometry. The IM7 antibody specific for mouse CD44 is recommended to test for immunohistochemical staining of formalin-fixed paraffin and acetone-fixed frozen sections. |                                                                     |                                                                                                                                                                                                                                                         | flow analysis of dissociated single cell liver. Data not included but available upon request. |
| LC3             | rabbit | IB | 1:1000 | ab48394 | Abcam          | Our Abpromise guarantee covers the use of ab48394 in the following tested applications: ICC/IF, IP, IHC-P, WB, IHC-Fr.                                                                                                                                                                                           | 1. Magalhaes, J et al. <u>Sci Rep.</u> 2018 Jan 23;8(1):1385.       | Validation by IB. expected molecular weight. Alteration in response to inhibition of autophagy by genetic deletion. Use of established lysosomal or autophagy inhibitors (3-Methyladenine, Leupepting/Aminochloride with alteration in LC3 I, II ratio) |                                                                                               |
| Atg5            | rabbit | IB | 1:1000 | 2630    | Cell signaling | Western blot analysis of extracts from various cell lines.                                                                                                                                                                                                                                                       | 1. Chai, K et al. <u>Oncotarget.</u> 2018 May 25;9(40):26130-26143. | Band at expected molecular weight. Decrease with shATG5 in cell lysates. Data is included in manuscript                                                                                                                                                 |                                                                                               |
| Nucleoporin p62 | mouse  | IB | 1:1000 | 610497  | BD Biosciences | Antibody is routinely tested in western blot. Immunoprecipitation and                                                                                                                                                                                                                                            | 1. Shah, M et al. <u>J Biol Chem.</u> 2002; 277(47):45662-45669.    | Bands at expected molecular weight in cytoplasmic and nuclear fractionation of cell lysates. Data                                                                                                                                                       |                                                                                               |

Addendum to Reporting Summary Lee et al final.

|  |  |  |  |  |  |                                                              |  |                            |  |
|--|--|--|--|--|--|--------------------------------------------------------------|--|----------------------------|--|
|  |  |  |  |  |  | immunofluorescenc<br>e were tested<br>during<br>development. |  | included in<br>manuscript. |  |
|--|--|--|--|--|--|--------------------------------------------------------------|--|----------------------------|--|
